# Supplementary material for: Fabrication of boron- and nitrogen-doped carbon nanoparticles by stress from pyrolysis of borazine-containing arylacetylene
Source: Royal Society of Chemistry journal article supplement (doi:10.1039/c3ra45775c), 2013-11-15
Supplement: c3ra45775c.pdf [file c3ra45775c.pdf]

## **Fabrication of boron and nitrogen-doped carbon nano-particles by stress from pyrolysis of borazine-containing arylacetylene**

Kangkang Guo<sup>a</sup>, Huimin Qi<sup>\*a</sup>, Fan Wang<sup>a</sup> and Yaping Zhu<sup>a</sup>

Key Laboratory of Special Functional Polymeric Materials and Related Technology of Ministry of Education, School of Materials Science and Engineering, East China University of Science & Technology, 200237 Shanghai, China

Elemental analysis was determined using an Elementar Vario EL III elemental analyzer (for nitrogen) and inductively coupled plasma atomic emission spectroscopy (ICP-AES, IRIS 1000; Thermo Elemental, Franklin, MA) (for boron). The contents of boron and nitrogen in obtained carbon nano-particles after carbonization at 1200°C are shown in Table 1S.

Table 1S the contents of boron and nitrogen in obtained carbon nano-particles after carbonization at 1200°C

| Sample | Boron (%) | Nitrogen (%) |
|--------|-----------|--------------|
| PBZA-H | 6.50      | 6.41         |
| PBZA-V | 6.20      | 5.85         |
